# Supplementary material for: Occult pneumothorax in patients with blunt chest trauma: key findings on supine chest radiography
Source: PubMed Central journal article supplement — J Thorac Dis. 2023 Aug 3;15(8):4379–86. doi: 10.21037/jtd-23-541 (PMC10482646; doi:10.21037/jtd-23-541), 2023-08-03
Supplement: jtd-15-08-4379-dss.pdf [file jtd-15-08-4379-dss.pdf]

## Data Sharing Statement

|                     |                                                                                                                                                     |                                                                                                                                                                                                                                                                  |
|---------------------|-----------------------------------------------------------------------------------------------------------------------------------------------------|------------------------------------------------------------------------------------------------------------------------------------------------------------------------------------------------------------------------------------------------------------------|
| <b>Article Info</b> | https://dx.doi.org/10.21037/jtd-23-541                                                                                                              |                                                                                                                                                                                                                                                                  |
| <b>Item</b>         | <b>Question</b>                                                                                                                                     | <b>Authors' Response<br/>(place "-" if not applicable)</b>                                                                                                                                                                                                       |
| 1                   | Would you like to share data collected for your study to others?                                                                                    | Yes                                                                                                                                                                                                                                                              |
| 2                   | If not, would you like to share the reason for your decision?                                                                                       | -                                                                                                                                                                                                                                                                |
| 3                   | What data in particular will be shared?                                                                                                             | All of the data that are related to occult pneumothorax will be shared.                                                                                                                                                                                          |
| 4                   | Any other documents will be shared? Such as study protocol, statistical analysis plan, informed consent form, clinical study report, analytic code. | -                                                                                                                                                                                                                                                                |
| 5                   | When will data availability begin?                                                                                                                  | From the publication date.                                                                                                                                                                                                                                       |
| 6                   | When will data availability end?                                                                                                                    | One years within the publication date                                                                                                                                                                                                                            |
| 7                   | To whom will you share the data?                                                                                                                    | Thoracic surgeons or Trauma physician who are interested in studies of occult pneumothorax.                                                                                                                                                                      |
| 8                   | For what type of analysis or purpose?                                                                                                               | For analysis to evaluate the epidemic data and risk factors related to the occult pneumothorax in blunt trauma patients.                                                                                                                                         |
| 9                   | How or where can the data/documents be obtained?                                                                                                    | Emails could be sent to the address below to obtain the shared data: csbyun@yonsei.ac.kr.                                                                                                                                                                        |
| 10                  | Any other restrictions?                                                                                                                             | Before you use our dataset, you need to be approved by our institution's Ethics Committee, Institutional Review Board for Human Research of Yonsei University Wonju Severance Christian Hospital. (contact via [+82] 033-741-1702, or E-mail: irb@yonsei.ac.kr). |
